# Supplementary material for: Characterization of the Complete Mitochondrial Genome of Agelas nakamurai from the South China Sea
Source: MDPI journal article supplement (doi:10.3390/ijms25010357), 2023-12-26
Supplement: s1 [file s1]

## Supplementary Tables and Figures

**Supplementary Table S1.** Detailed annotation information of *Agelas nakamura* mitochondrial genome.

| Feature        | Nucleotide size<br>(bp) | Position    | Product                        | Start codon | Stop codon |
|----------------|-------------------------|-------------|--------------------------------|-------------|------------|
| cox1           | 1569                    | 1-1569      | cytochrome c oxidase subunit 1 | ATG         | TAA        |
| tRNA-Ser (TGA) | 80                      | 1647-1726   | tRNA-Ser                       |             |            |
| tRNA-Ala (TGC) | 72                      | 1740-1811   | tRNA-Ala                       |             |            |
| tRNA-Cys (GCA) | 72                      | 1850-1921   | tRNA-Cys                       |             |            |
| nad1           | 975                     | 2022-2996   | NADH dehydrogenase subunit 1   | ATG         | TAG        |
| tRNA-Leu (TAA) | 71                      | 3083-3153   | tRNA-Leu                       |             |            |
| tRNA-Leu (TAG) | 72                      | 3265-3336   | tRNA-Leu                       |             |            |
| tRNA-Tyr (GTA) | 72                      | 3359-3430   | tRNA-Tyr                       |             |            |
| tRNA-Met (CAT) | 72                      | 3439-3510   | tRNA-Met                       |             |            |
| tRNA-Met (CAT) | 71                      | 3537-3607   | tRNA-Met                       |             |            |
| nad2           | 1461                    | 3669-5129   | NADH dehydrogenase subunit 2   | ATG         | TAA        |
| nad5           | 1866                    | 5170-7035   | NADH dehydrogenase subunit 5   | ATG         | TAA        |
| tRNA-Ile (GAT) | 71                      | 7077-7147   | tRNA-Ile                       |             |            |
| tRNA-Phe (GAA) | 71                      | 7186-7256   | tRNA-Phe                       |             |            |
| rns            | 1275                    | 7257-8531   | s-rRNA                         |             |            |
| tRNA-Gly (TCC) | 72                      | 8532-8603   | tRNA-Gly                       |             |            |
| tRNA-Val (TAC) | 73                      | 8605-8677   | tRNA-Val                       |             |            |
| rnl            | 2587                    | 8784-11370  | l-rRNA                         |             |            |
| cox2           | 744                     | 11782-12525 | cytochrome c oxidase subunit 2 | ATG         | TAA        |
| atp8           | 285                     | 12575-12859 | ATP synthase F0 subunit 8      | ATG         | TAA        |
| atp6           | 735                     | 12987-13721 | ATP synthase F0 subunit 6      | GTG         | TAA        |
| tRNA-Arg (TCT) | 73                      | 13845-13917 | tRNA-Arg                       |             |            |
| cox3           | 786                     | 13994-14779 | cytochrome c oxidase subunit 3 | ATG         | TAA        |
| tRNA-Gln (TTG) | 73                      | 14838-14910 | tRNA-Gln                       |             |            |
| tRNA-Trp (TCA) | 71                      | 14950-15020 | tRNA-Trp                       |             |            |
| cob            | 1146                    | 15092-16237 | cytochrome b                   | ATG         | TAG        |
| tRNA-Thr (TGT) | 72                      | 16330-16401 | tRNA-Thr                       |             |            |
| atp9           | 237                     | 16549-16785 | ATP synthase F0 subunit 9      | ATG         | TAA        |
| tRNA-Ser (GCT) | 84                      | 16990-17073 | tRNA-Ser                       |             |            |
| tRNA-Lys (TTT) | 73                      | 17101-17173 | tRNA-Lys                       |             |            |
| tRNA-Asn (GTT) | 71                      | 17239-17309 | tRNA-Asn                       |             |            |
| tRNA-Met (CAT) | 71                      | 17377-17447 | tRNA-Met                       |             |            |
| tRNA-His (GTG) | 73                      | 17456-17528 | tRNA-His                       |             |            |
| tRNA-Pro (TGG) | 72                      | 17569-17640 | tRNA-Pro                       |             |            |
| nad4           | 1470                    | 17661-19130 | NADH dehydrogenase subunit 4   | ATG         | TAA        |
| tRNA-Glu (TTC) | 73                      | 19184-19256 | tRNA-Glu                       |             |            |

|                |     |             |                               |     |     |
|----------------|-----|-------------|-------------------------------|-----|-----|
| nad6           | 573 | 19254-19826 | NADH dehydrogenase subunit 6  | GTG | TAA |
| nad3           | 357 | 19919-20275 | NADH dehydrogenase subunit 3  | ATG | TAG |
| tRNA-Arg (TCG) | 71  | 20474-20544 | tRNA-Arg                      |     |     |
| nad4L          | 300 | 20545-20844 | NADH dehydrogenase subunit 4L | ATG | TAA |

---

**Supplementary Table S2.** Detailed information of 38 Demospongiae sponge mitochondrial genomes for phylogenetic analysis.

| Accession   | Organism                            | Order           | Superfamily     | Family             | Genus          | Length | AT%  |
|-------------|-------------------------------------|-----------------|-----------------|--------------------|----------------|--------|------|
| OQ363829    | <i>Agelas nakamurai</i>             | Agelasida       | Agelasida       | Agelasidae         | Agelas         | 20885  | 62.4 |
| NC_010213.1 | <i>Agelas schmidtii</i>             | Agelasida       | Agelasida       | Agelasidae         | Agelas         | 20360  | 61.7 |
| NC_008944.1 | <i>Amphimedon queenslandica</i>     | Haplosclerida   | Haplosclerida   | Niphatidae         | Amphimedon     | 19960  | 56.1 |
| NC_010203.1 | <i>Aplysina fulva</i>               | Verongiida      | Verongiida      | Aplysinidae        | Aplysina       | 19620  | 67.1 |
| NC_053937.1 | <i>Aplysina gerardogreeni</i>       | Verongiida      | Verongiida      | Aplysinidae        | Aplysina       | 19620  | 67.2 |
| NC_006894.1 | <i>Axinella corrugata</i>           | Axinellida      | Axinellida      | Axinellidae        | Axinella       | 25610  | 57.1 |
| JQ302310.1  | <i>Baikalospongia intermedia</i>    | Spongillida     | Spongillida     | Lubomirskiidae     | Baikalospongia | 28227  | 58.8 |
| NC_031192.1 | <i>Cacospongia mycofijiensis</i>    | Dictyoceratida  | Dictyoceratida  | Thorectidae        | Cacospongia    | 16227  | 62.9 |
| NC_010206.1 | <i>Callyspongia plicifera</i>       | Haplosclerida   | Haplosclerida   | Callyspongiidae    | Callyspongia   | 18846  | 64.3 |
| NC_010208.1 | <i>Chondrilla aff. nucula CHOND</i> | Chondrillida    | Chondrillida    | Chondrillidae      | Chondrilla     | 19282  | 66.4 |
| NC_010198.1 | <i>Cinachyrella kuekenthali</i>     | Tetractinellida | Tetractinellida | Tetillidae         | Cinachyrella   | 18089  | 64   |
| NC_069646.1 | <i>Cliona patera</i>                | Clionaida       | Clionaida       | Clionaidae         | Cliona         | 19133  | 67   |
| NC_027520.1 | <i>Crella elegans</i>               | Poecilosclerida | Poecilosclerida | Crellidae          | Crella         | 18543  | 63.9 |
| NC_010210.1 | <i>Ectyoplasia ferox</i>            | Axinellida      | Axinellida      | Raspailiidae       | Ectyoplasia    | 18312  | 69.5 |
| NC_010202.1 | <i>Ephydatia muelleri</i>           | Spongillida     | Spongillida     | Spongillidae       | Ephydatia      | 23929  | 59.6 |
| NC_016431.1 | <i>Eunapius subterraneus</i>        | Spongillida     | Spongillida     | Spongillidae       | Eunapius       | 24850  | 59.2 |
| NC_006990.1 | <i>Geodia neptuni</i>               | Tetractinellida | Tetractinellida | Geodiidae          | Geodia         | 18020  | 66.5 |
| NC_037391.1 | <i>Halichondria okadai</i>          | Suberitida      | Suberitida      | Halichondriidae    | Halichondria   | 20722  | 64.2 |
| NC_014876.1 | <i>Halisarca harmelini</i>          | Dendroceratida  | Dendroceratida  | Halisarcidae       | Halisarca      | 20591  | 65.4 |
| EU237484.1  | <i>Hippospongia lachne</i>          | Dictyoceratida  | Dictyoceratida  | Spongiidae         | Hippospongia   | 16755  | 63   |
| NC_021422.1 | <i>Hyattella sinuosa</i>            | Dictyoceratida  | Dictyoceratida  | Spongiidae         | Hyattella      | 16422  | 62.7 |
| NC_022450.1 | <i>Hymeniacidon sinapium</i>        | Suberitida      | Suberitida      | Halichondriidae    | Hymeniacidon   | 23435  | 65.5 |
| NC_010216.1 | <i>Igernella notabilis</i>          | Dendroceratida  | Dendroceratida  | Dictyodendrillidae | Igernella      | 20310  | 72   |
| NC_010207.1 | <i>Iotrochota birotulata</i>        | Poecilosclerida | Poecilosclerida | Iotrochotidae      | Iotrochota     | 19112  | 64.4 |
| NC_013662.1 | <i>Ircinia strobilina</i>           | Dictyoceratida  | Dictyoceratida  | Irciniidae         | Ircinia        | 16414  | 63   |
| NC_013760.1 | <i>Lubomirskia baikalensis</i>      | Spongillida     | Spongillida     | Lubomirskiidae     | Lubomirskia    | 28958  | 58.5 |
| KR911863.1  | <i>Petrosia ficiformis</i>          | Haplosclerida   | Haplosclerida   | Petrosiidae        | Petrosia       | 18887  | 63.7 |

|             |                                 |                 |                 |                 |              |       |      |
|-------------|---------------------------------|-----------------|-----------------|-----------------|--------------|-------|------|
| NC_025335.1 | <i>Poecillastra laminaris</i>   | Tetractinellida | Tetractinellida | Vulcanellidae   | Poecillastra | 18413 | 64.3 |
| NC_023834.1 | <i>Polymastia littoralis</i>    | Polymastiida    | Polymastiida    | Polymastiidae   | Polymastia   | 21719 | 69   |
| NC_010209.1 | <i>Ptilocaulis walpersi</i>     | Axinellida      | Axinellida      | Axinellidae     | Ptilocaulis  | 18865 | 71.4 |
| NC_018360.1 | <i>Rezinkovia echinata</i>      | Spongillida     | Spongillida     | Lubomirskiidae  | Rezinkovia   | 28614 | 58.7 |
| NC_010496.1 | <i>Suberites domuncula</i>      | Suberitida      | Suberitida      | Suberitidae     | Suberites    | 26300 | 64.5 |
| NC_065020.1 | <i>Terpios hoshinota</i>        | Suberitida      | Suberitida      | NA              | Terpios      | 20504 | 63.5 |
| NC_006991.1 | <i>Tethya actinia</i>           | Tethyida        | Tethyida        | Tethyidae       | Tethya       | 19565 | 70.6 |
| MN587873.1  | <i>Thoosa mismalolli</i>        | Tetractinellida | Tetractinellida | Thoosidae       | Thoosa       | 19019 | 66.7 |
| NC_010204.1 | <i>Topsentia ophiraphidites</i> | Suberitida      | Suberitida      | NA              | Topsentia    | 19763 | 66.3 |
| NC_010218.1 | <i>Vaceletia</i> sp.            | Dictyoceratida  | Dictyoceratida  | Verticillitidae | Vaceletia    | 20658 | 70.6 |
| NC_010211.1 | <i>Xestospongia muta</i>        | Haplosclerida   | Haplosclerida   | Petrosiidae     | Xestospongia | 18990 | 66.1 |

**Supplementary Table S3.** Information on 17 mitochondrial genomes of Demospongiae sponges for evolutionary analysis.

| Accession  | Organism                        | Order           | Superfamily     | Family          | Genus        | Length | AT%  |
|------------|---------------------------------|-----------------|-----------------|-----------------|--------------|--------|------|
| OQ363829   | <i>Agelas nakamurai</i>         | Agelasida       | Agelasida       | Agelasidae      | Agelas       | 20885  | 62.4 |
| EU237475.1 | <i>Agelas schmidtii</i>         | Agelasida       | Agelasida       | Agelasidae      | Agelas       | 20360  | 61.7 |
| EU237474.1 | <i>Amphimedon compressa</i>     | Haplosclerida   | Haplosclerida   | Niphatidae      | Amphimedon   | 18564  | 59.2 |
| EU237477.1 | <i>Callyspongia plicifera</i>   | Haplosclerida   | Haplosclerida   | Callyspongiidae | Callyspongia | 18846  | 64.3 |
| EU237479.1 | <i>Cinachyrella kuekenthali</i> | Tetractinellida | Tetractinellida | Tetillidae      | Cinachyrella | 18089  | 64   |
| KR911862.1 | <i>Crella elegans</i>           | Poecilosclerida | Poecilosclerida | Crellidae       | Crella       | 18543  | 63.9 |
| EU237480.1 | <i>Ectyoplasia ferox</i>        | Axinellida      | Axinellida      | Raspailiidae    | Ectyoplasia  | 18312  | 69.5 |
| EU237481.1 | <i>Ephydatia muelleri</i>       | Spongillida     | Spongillida     | Spongillidae    | Ephydatia    | 23929  | 59.6 |
| AY320032.1 | <i>Geodia neptuni</i>           | Tetractinellida | Tetractinellida | Geodiidae       | Geodia       | 18020  | 66.5 |
| MH756603.1 | <i>Halichondria panicea</i>     | Suberitida      | Suberitida      | Halichondriidae | Halichondria | 19571  | 63.2 |
| EU237486.1 | <i>Iotrochota birotulata</i>    | Poecilosclerida | Poecilosclerida | Iotrochotidae   | Iotrochota   | 19112  | 64.4 |
| KR911863.1 | <i>Petrosia ficiformis</i>      | Haplosclerida   | Haplosclerida   | Petrosiidae     | Petrosia     | 18887  | 63.7 |
| EU237488.1 | <i>Ptilocaulis walpersi</i>     | Axinellida      | Axinellida      | Axinellidae     | Ptilocaulis  | 18865  | 71.4 |
| AY320033.1 | <i>Tethya actinia</i>           | Tethyida        | Tethyida        | Tethyidae       | Tethya       | 19565  | 70.6 |
| MN587873.1 | <i>Thoosa mismalolli</i>        | Tetractinellida | Tetractinellida | Thoosidae       | Thoosa       | 19019  | 66.7 |
| EU237482.1 | <i>Topsentia ophiraphidites</i> | Suberitida      | Suberitida      | NA              | Topsentia    | 19763  | 66.3 |
| EU237490.1 | <i>Xestospongia muta</i>        | Haplosclerida   | Haplosclerida   | Petrosiidae     | Xestospongia | 18990  | 66.1 |

**Supplementary Table S4.** Best partition scheme and model for BI phylogenetic analysis.

| Subset partitions                   | Best model |
|-------------------------------------|------------|
| P1: (atp6, cox2, cox3, nad1)        | GTR+F+I+G4 |
| P2: (atp8)                          | HKY+F+I+G4 |
| P3: (atp9)                          | GTR+F+I+G4 |
| P4: (cox1)                          | GTR+F+I+G4 |
| P5: (cytb, nad2)                    | GTR+F+I+G4 |
| P6: (nad3, nad4L, nad4, nad5, nad6) | GTR+F+I+G4 |

**Supplementary Table S5.** Best partition scheme and model for ML phylogenetic analysis.

| Subset partitions                        | Best model     |
|------------------------------------------|----------------|
| P1: (atp6, cox3)                         | GTR+F+R4       |
| P2: (atp8)                               | TPM3u+F+I+I+R3 |
| P3: (atp9)                               | TIM+F+I+G4     |
| P4: (cox1)                               | TIM2+F+I+G4    |
| P5: (cox2, nad1, nad3, nad4, nad5, nad6) | GTR+F+I+I+R4   |
| P6: (cytb, nad2, nad4L)                  | GTR+F+I+I+R4   |

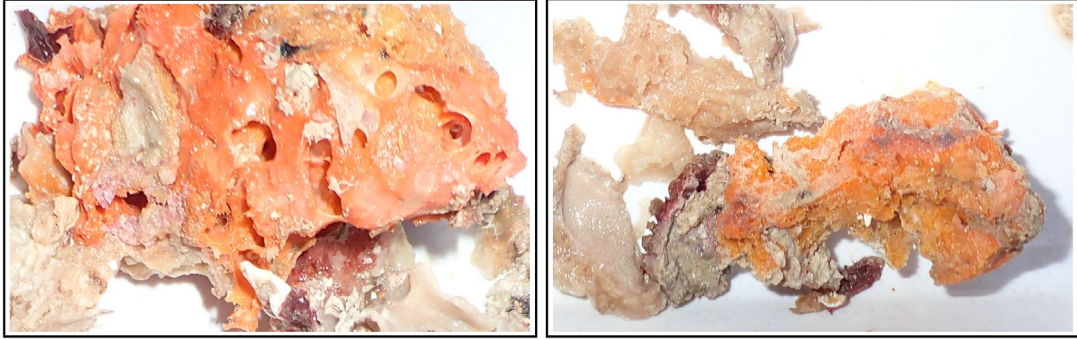

**Supplementary Figure S1.** Sponge tissue sample placed on the dissection tray.

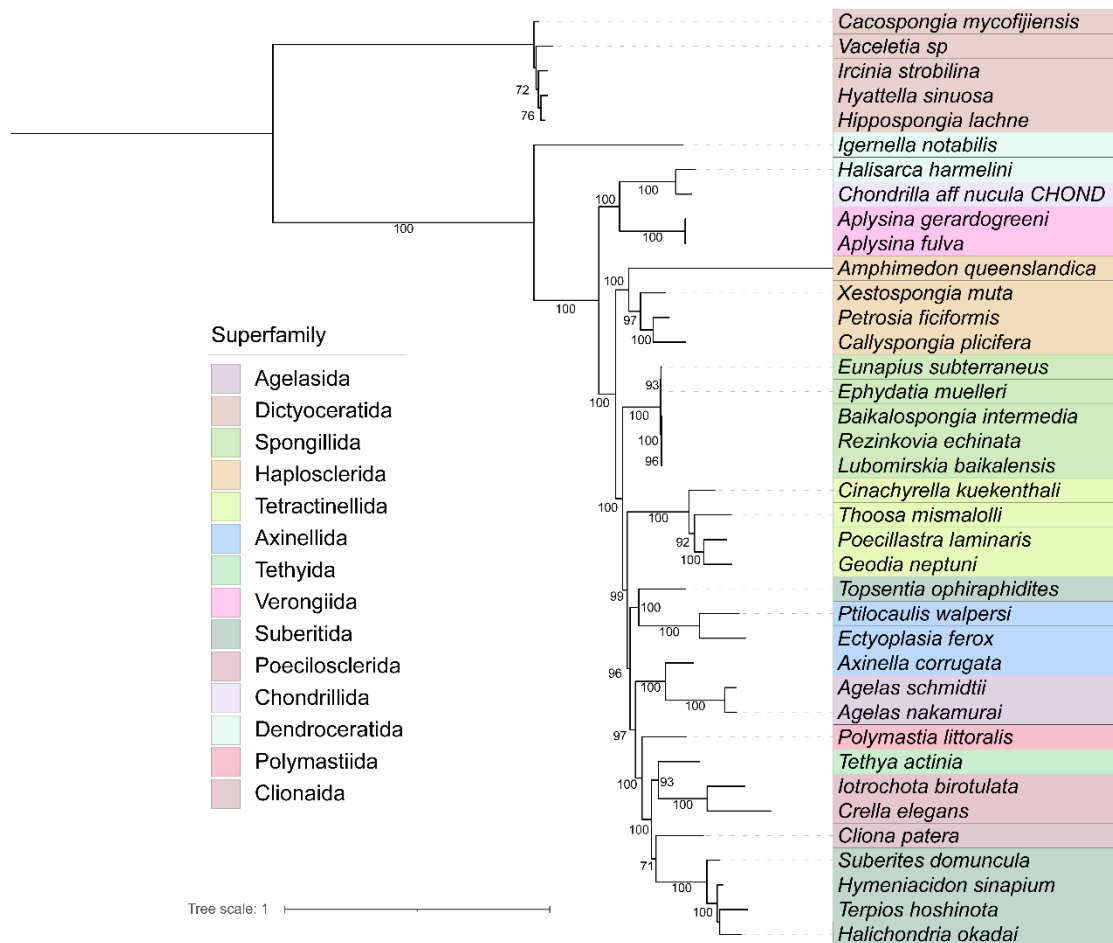

**Supplementary Figure S2.** ML phylogenetic tree of 38 Demospongiae sponges constructed using mitochondrial genome PCGs. *Hippospongia lachne*, *Hyattella sinuosa*, *Ircinia strobilina*, *Vaceletia* sp. and *Cacospongia mycofijiensis* were used as outgroups for tree construction. The numbers adjacent to the nodes indicate the percent posterior probability values, with only values exceeding 70 being shown. Leaf labels are color-coded to represent different superfamilies.



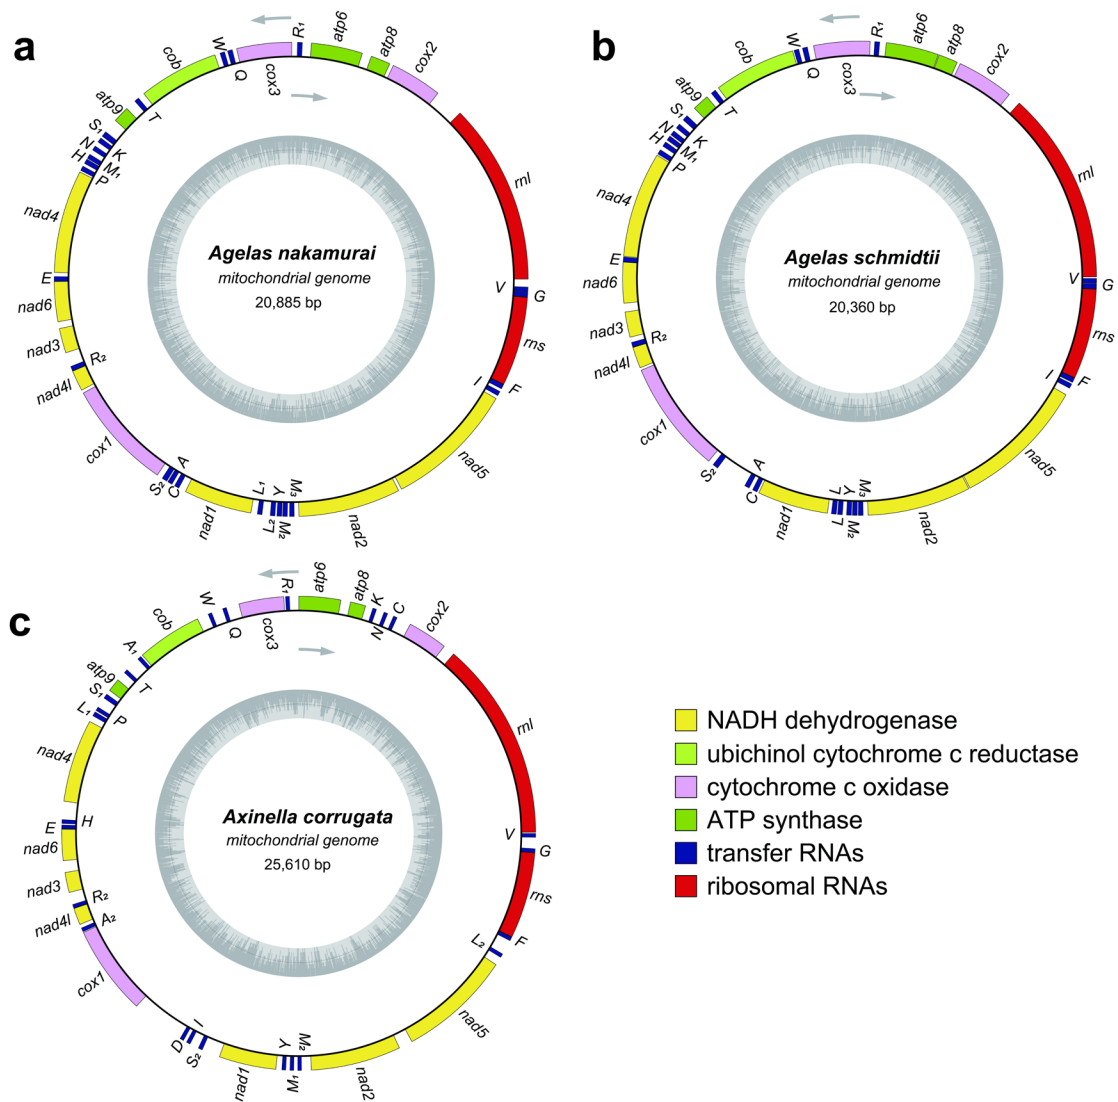

**Supplementary Figure S3.** Mitogenome maps of *Agelas nakamurai*, *Agelas schmidtii*, and *Axinella corrugata*. (a), (b) and (c) represent the complete mitogenome maps of *Agelas nakamurai*, *Agelas schmidtii*, and *Axinella corrugata*, respectively. Distinct colors correspond to various genes. The tRNA genes are denoted by single-letter abbreviations representing the accepted amino acid. The gray inner ring represents the GC content of the sequence.

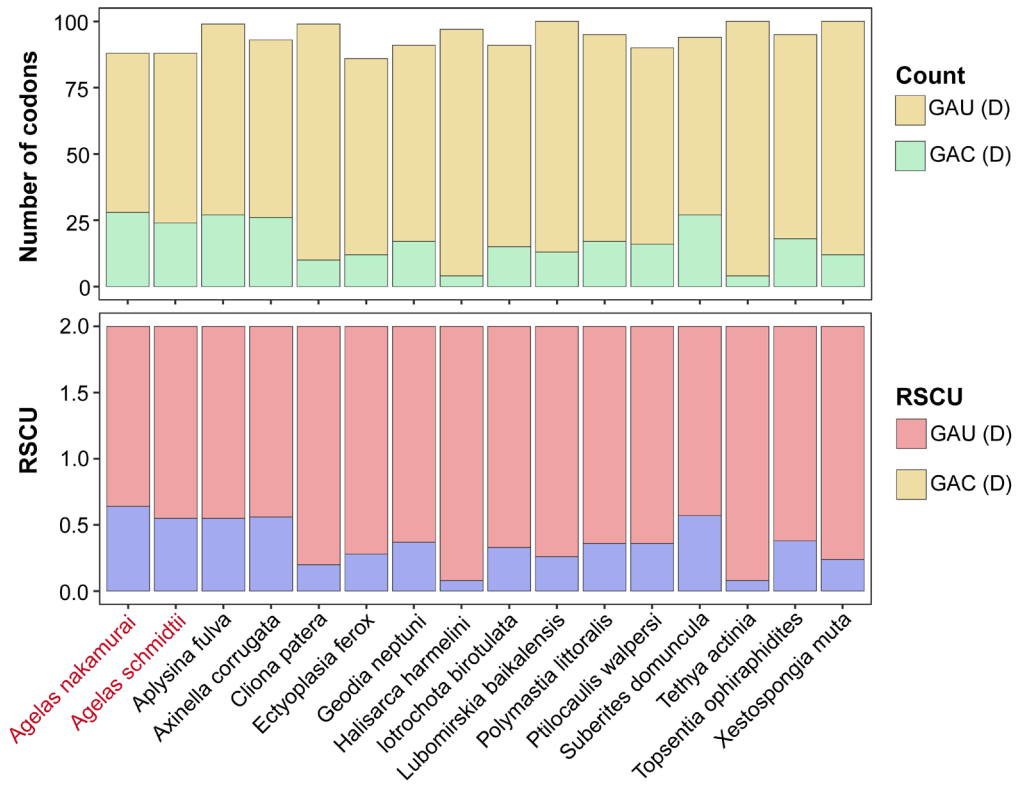

**Supplementary Figure S4.** Number of aspartic acid codons and RSCU in 16 Demospongiae mitochondrial PCGs.
